# Supplementary material for: Chronic Exposure to Type-I IFN under Lymphopenic Conditions Alters CD4 T Cell Homeostasis
Source: PubMed Central journal article supplement (PMC3946368; doi:10.1371/journal.ppat.1003976), 2014-03-06

**Figure S2**

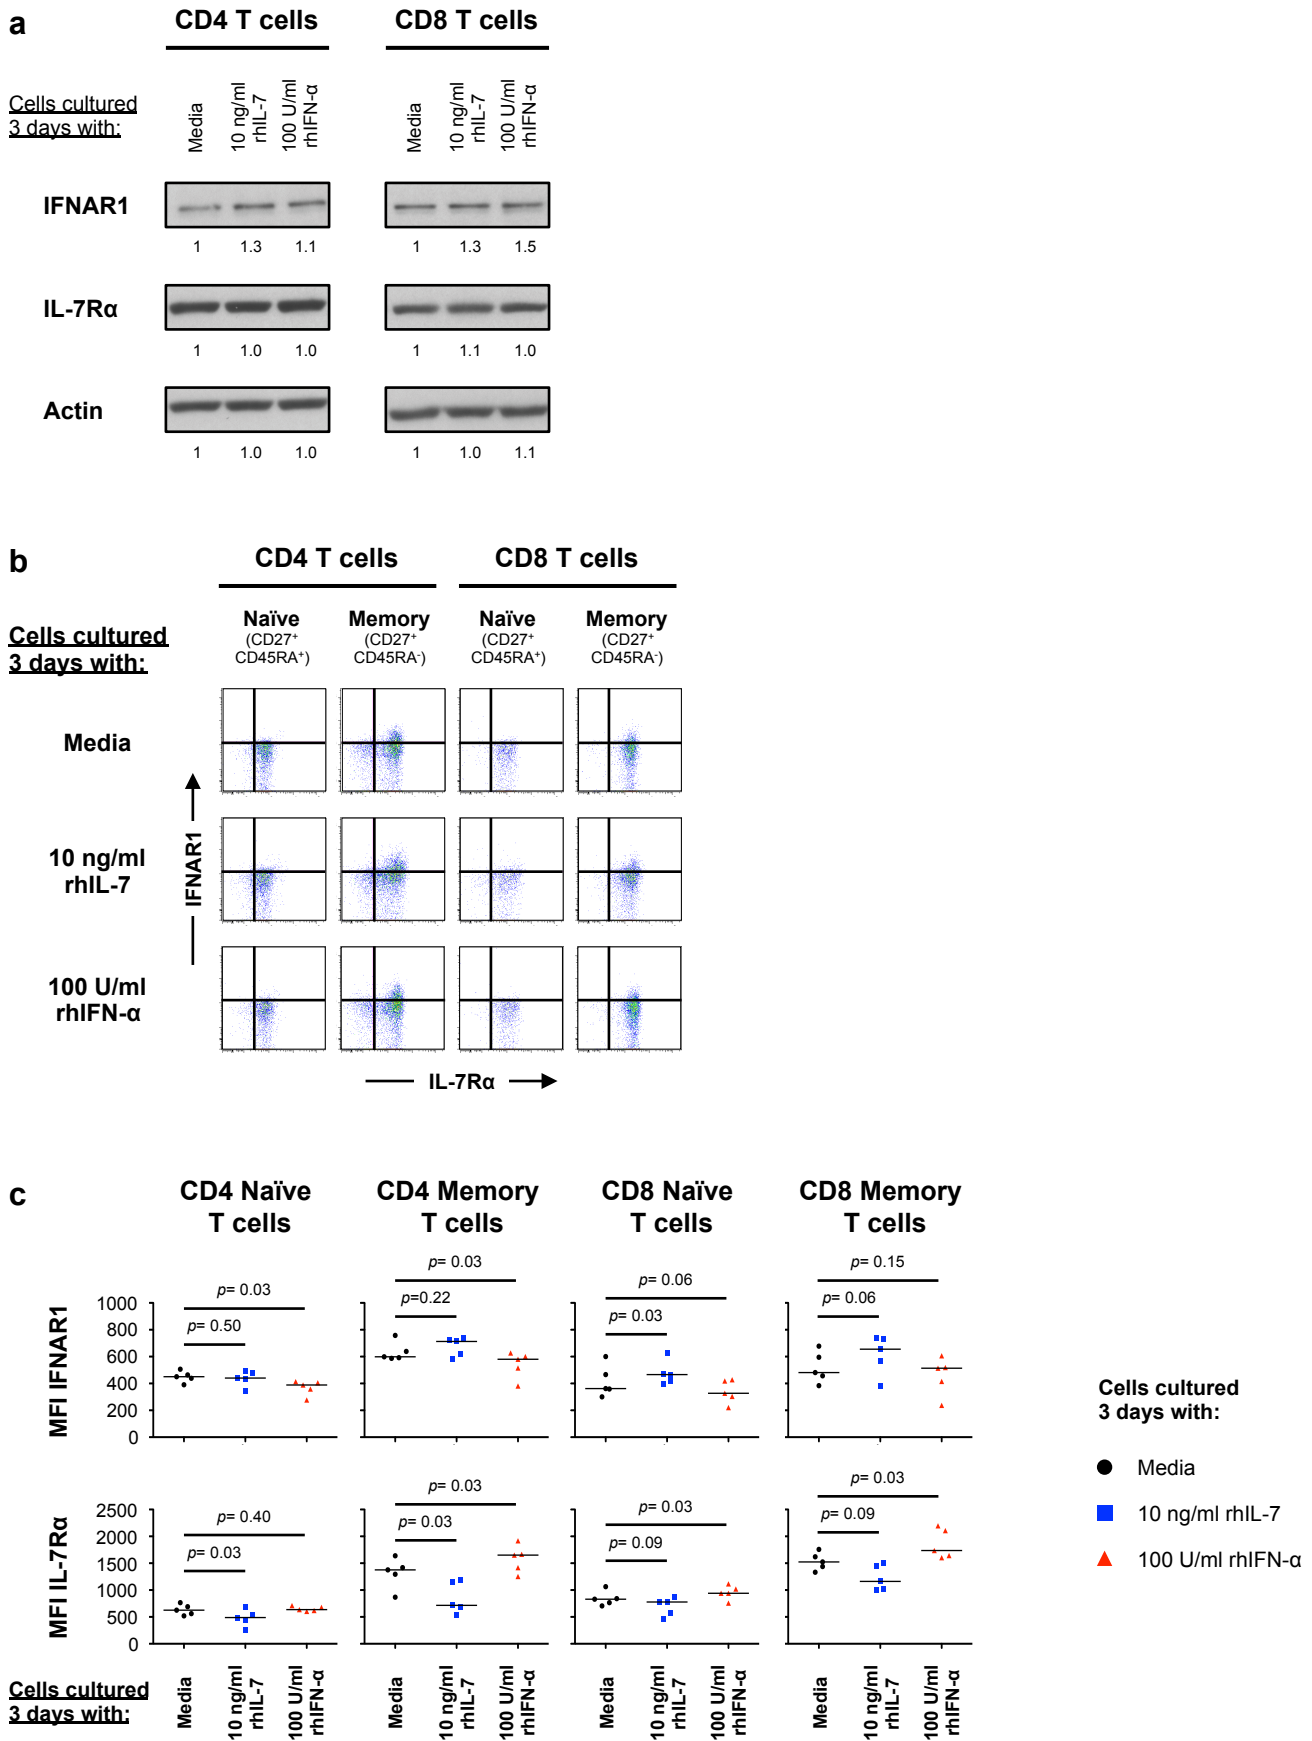

Supplement: ppat.1003976.s002.pdf [file ppat.1003976.s002.pdf]
