# Supplementary material for: Chronic Exposure to Type-I IFN under Lymphopenic Conditions Alters CD4 T Cell Homeostasis
Source: PubMed Central journal article supplement (PMC3946368; doi:10.1371/journal.ppat.1003976), 2014-03-06
Supplement: ppat.1003976.s008.pdf [file ppat.1003976.s008.pdf]

| Patient Number   | Experiment            | Visit Date Sample tested | Months viral load <50 copies/ml | Coinfection history                                                                                      |                                                                                                                                            |                             |                         |                                                                                                                                                                                                                                                              |                      |           |                                                         |                              |  |                              |
|------------------|-----------------------|--------------------------|---------------------------------|----------------------------------------------------------------------------------------------------------|--------------------------------------------------------------------------------------------------------------------------------------------|-----------------------------|-------------------------|--------------------------------------------------------------------------------------------------------------------------------------------------------------------------------------------------------------------------------------------------------------|----------------------|-----------|---------------------------------------------------------|------------------------------|--|------------------------------|
|                  |                       |                          |                                 | Cytomegalovirus (CMV)                                                                                    | Epstein-Barr virus (EBV)                                                                                                                   | Hepatitis B virus (HBV)     | Hepatitis C virus (HCV) | Herpes simplex virus (HSV)                                                                                                                                                                                                                                   | Influenza A          | Rotavirus | Respiratory syncytial virus (RSV)                       | Varicella zoster virus (VZV) |  |                              |
| Figure 4 - Pt 28 | Cross-sectional Study | 2/19/08                  | 13                              |                                                                                                          | PCR + (2/15/2006, 1/27/06), Negative 4/28/05                                                                                               |                             |                         |                                                                                                                                                                                                                                                              |                      |           |                                                         |                              |  |                              |
| Figure 4 - Pt 29 | Cross-sectional Study | 8/5/08                   | 17                              |                                                                                                          |                                                                                                                                            |                             |                         |                                                                                                                                                                                                                                                              |                      |           | Isolate parainfluenza type 1 (7/14/09), EIA + (1/29/08) |                              |  |                              |
| Figure 4 - Pt 30 | Cross-sectional Study | 1/21/10                  | 41                              |                                                                                                          |                                                                                                                                            |                             |                         |                                                                                                                                                                                                                                                              |                      |           |                                                         |                              |  |                              |
| Figure 4 - Pt 31 | Cross-sectional Study | 3/22/11                  | 37                              |                                                                                                          |                                                                                                                                            |                             |                         |                                                                                                                                                                                                                                                              | PCR + (02/16/11)     |           |                                                         |                              |  |                              |
| Figure 4 - Pt 32 | Cross-sectional Study | 9/21/10                  | 8                               |                                                                                                          | 7447550 copies/mL (6/15/13), 850 copies/mL (8/15/2012), PCR + (10/22/2009)                                                                 |                             |                         |                                                                                                                                                                                                                                                              |                      |           |                                                         |                              |  |                              |
| Figure 4 - Pt 33 | Cross-sectional Study | 12/7/10                  | 19                              |                                                                                                          |                                                                                                                                            |                             |                         |                                                                                                                                                                                                                                                              |                      |           |                                                         |                              |  |                              |
| Figure 4 - Pt 34 | Cross-sectional Study | 6/22/06                  | 7                               |                                                                                                          | PCR + (3/15/06, 11/3/05), PCR - (7/20/05)                                                                                                  |                             |                         |                                                                                                                                                                                                                                                              | Culture + (03/22/06) |           |                                                         |                              |  |                              |
| Figure 4 - Pt 35 | Cross-sectional Study | 4/23/03                  | 17                              |                                                                                                          |                                                                                                                                            |                             |                         | PCR + (1/4/07), RNA IU: 24900000 IU/mL (10/5/11), 13300000 IU/mL (6/14/11), 64,300 IU/mL (11/4/08), 257000 IU/mL(1/4/07) RNA Quantitative: 67230000 copies/mL (10/5/11), 35910000 copies/mL (6/14/11), 173610 copies/mL (11/4/08), 693900 copies/mL (1/4/07) |                      |           |                                                         |                              |  |                              |
| Figure 4 - Pt 36 | Cross-sectional Study | 5/14/03                  | 6                               |                                                                                                          |                                                                                                                                            |                             |                         |                                                                                                                                                                                                                                                              |                      |           | Isolate Influenza A 12/26/03                            |                              |  |                              |
| Figure 4 - Pt 37 | Cross-sectional Study | 10/13/09                 | 9                               |                                                                                                          |                                                                                                                                            |                             |                         |                                                                                                                                                                                                                                                              |                      |           |                                                         |                              |  |                              |
| Figure 4 - Pt 38 | Cross-sectional Study | 2/8/05                   | 7                               |                                                                                                          |                                                                                                                                            | HBs Ag: Reactive (02/08/05) |                         |                                                                                                                                                                                                                                                              | Culture + (7/20/04)  |           |                                                         |                              |  |                              |
| Figure 4 - Pt 39 | Cross-sectional Study | 4/28/09                  | 12                              |                                                                                                          |                                                                                                                                            |                             |                         |                                                                                                                                                                                                                                                              |                      |           |                                                         |                              |  |                              |
| Figure 4 - Pt 40 | Cross-sectional Study | 12/16/04                 | 8                               |                                                                                                          | PCR + (7/22/04), ND (8/18/09)<br>PCR + (1/13/10), PCR Low + (11/12/09, 6/3/09, 2/11/09, 7/1/08, 3/13/08, 12/18/07), ND (10/23/08, 9/25/07) |                             |                         |                                                                                                                                                                                                                                                              |                      |           |                                                         |                              |  |                              |
| Figure 4 - Pt 41 | Cross-sectional Study | 12/18/07                 | 6                               | PCR Low + (10/23/08, 6/5/07, 5/10/07, 4/11/07, 3/29/07), PCR - (7/1/08, 7/3/07, 2/11/09) PCR + (4/25/07) |                                                                                                                                            |                             |                         |                                                                                                                                                                                                                                                              |                      |           |                                                         |                              |  | PCR + (7/1/08), PCR - 4/4/07 |



| Patient Number   | Experiment            | Visit Date Sample tested | Months viral load <50 copies/ml | Coinfection history   |                                   |                                                                                                                                                                                                                                                                                                                                 |                                                                                                                                                                                                                               |                            |                              |           |                                   |                              |  |
|------------------|-----------------------|--------------------------|---------------------------------|-----------------------|-----------------------------------|---------------------------------------------------------------------------------------------------------------------------------------------------------------------------------------------------------------------------------------------------------------------------------------------------------------------------------|-------------------------------------------------------------------------------------------------------------------------------------------------------------------------------------------------------------------------------|----------------------------|------------------------------|-----------|-----------------------------------|------------------------------|--|
|                  |                       |                          |                                 | Cytomegalovirus (CMV) | Epstein-Barr virus (EBV)          | Hepatitis B virus (HBV)                                                                                                                                                                                                                                                                                                         | Hepatitis C virus (HCV)                                                                                                                                                                                                       | Herpes simplex virus (HSV) | Influenza A                  | Rotavirus | Respiratory syncytial virus (RSV) | Varicella zoster virus (VZV) |  |
| Figure 4 - Pt 44 | Cross-sectional Study | 11/8/05                  | 16                              |                       |                                   | HBs Ag: Reactive (1/13/09), Repeat reactive (8/16/05, 9/3/04, 2/17/04), Hbe Ag: Reactive 9/6/02, DNA Quantitative: None detected (6/23/05), 927 copies/mL (9/3/04), 37,600,000 diluted 1:1000 copies/mL (2/17/04), 2,500,000,000 copies/mL dilute 1:10,000 (11/24/03), >500,000 copies/mL (9/6/02), 322,000 copies/mL (6/26/02) |                                                                                                                                                                                                                               |                            | Culture + (10/15/04)         |           |                                   |                              |  |
| Figure 4 - Pt 45 | Cross-sectional Study | 5/5/09                   | 17                              |                       | PCR + (3/11/10)                   |                                                                                                                                                                                                                                                                                                                                 |                                                                                                                                                                                                                               |                            |                              |           |                                   |                              |  |
| Figure 4 - Pt 46 | Cross-sectional Study | 11/13/08                 | 12                              |                       |                                   |                                                                                                                                                                                                                                                                                                                                 |                                                                                                                                                                                                                               |                            |                              |           |                                   |                              |  |
| Figure 4 - Pt 47 | Cross-sectional Study | 2/24/10                  | 11                              |                       |                                   |                                                                                                                                                                                                                                                                                                                                 |                                                                                                                                                                                                                               |                            |                              |           |                                   |                              |  |
| Figure 4 - Pt 48 | Cross-sectional Study | 12/18/08                 | 36                              |                       | PCR + (3/15/06, 11/3/05, 7/20/05) |                                                                                                                                                                                                                                                                                                                                 |                                                                                                                                                                                                                               |                            | Culture + (3/22/06, 3/15/06) |           |                                   |                              |  |
| Figure 4 - Pt 49 | Cross-sectional Study | 7/20/10                  | 40                              |                       |                                   |                                                                                                                                                                                                                                                                                                                                 | RNA Quantitative: 143640 copies/mL (10/18/12), 10,530,000 copies/mL (8/23/05), <1,620 copies/mL (6/7/05) None detected (5/3/09), RNA IU: 53200 IU/mL (10/18/12), 3,900,000 IU/mL, <600 IU/mL (6/7/05), none detected (5/3/09) |                            | PCR + (10/2/12)              |           |                                   |                              |  |
| Figure 4 - Pt 50 | Cross-sectional Study | 3/29/10                  | 6                               |                       |                                   |                                                                                                                                                                                                                                                                                                                                 |                                                                                                                                                                                                                               |                            | Culture + (7/24/07)          |           |                                   |                              |  |
| Figure 4 - Pt 51 | Cross-sectional Study | 4/28/09                  | 8                               |                       |                                   |                                                                                                                                                                                                                                                                                                                                 |                                                                                                                                                                                                                               |                            |                              |           |                                   |                              |  |
| Figure 4 - Pt 52 | Cross-sectional Study | 12/3/10                  | 21                              |                       | PCR Low + (12/4/08)               |                                                                                                                                                                                                                                                                                                                                 |                                                                                                                                                                                                                               |                            |                              |           |                                   |                              |  |
| Figure 4 - Pt 53 | Cross-sectional Study | 3/29/11                  | 113                             |                       |                                   | HBs Ag: + (1/5/10, 7/2/09), Repeat reactive known positive (4/6/04, 2/11/03), DNA Quantitative: None detected (9/24/13, 5/4/10, 2/26/08, 6/26/03, 10/3/02), <169 copies/mL (3/29/11), 58 copies/mL (1/5/10), DNA IU: <29 IU/mL (3/29/11), <10 IU/mL (1/5/10)                                                                    |                                                                                                                                                                                                                               |                            |                              |           |                                   |                              |  |
